# Supplementary material for: Dual Pd and CuFe2O4 nanoparticles encapsulated in a core/shell silica microsphere for selective hydrogenation of arylacetylenes
Source: Royal Society of Chemistry journal article supplement (doi:10.1039/c2cc30285c), 2012-01-01
Supplement: c2cc30285c.pdf [file c2cc30285c.pdf]

## Supporting Information

### Dual Pd and CuFe<sub>2</sub>O<sub>4</sub> nanoparticles encapsulated in a core/shell silica microsphere for selective hydrogenation of arylacetylenes

Kyu Hyung Lee, Byeongno Lee, Kyu Reon Lee, Mi hye Yi and Nam Hwi Hur\*

Department of Chemistry, Sogang University, Seoul 121-742, Korea

\*e-mail: [nhhur@sogang.ac.kr](mailto:nhhur@sogang.ac.kr)

---

#### Table of Contents

|                                                      |              |
|------------------------------------------------------|--------------|
| <b>I. Experimental details</b>                       | <b>S2</b>    |
| <b>II. Instrumentation</b>                           | <b>S2-3</b>  |
| <b>III. Fabrication of Encapsulated Catalysts</b>    | <b>S3-5</b>  |
| <b>IV. General Procedure for Catalytic Reactions</b> | <b>S5-7</b>  |
| <b>V. Tables and Figures</b>                         | <b>S7-24</b> |
| <b>VI. References</b>                                | <b>S24</b>   |

## I. Experimental details

**Reagents.** Copper nitrate hemi(pentahydrate) ( $\text{Cu}(\text{NO}_3)_2 \cdot 2.5\text{H}_2\text{O}$ , 98+%) , cobalt nitrate hexahydrate ( $\text{Co}(\text{NO}_3)_2 \cdot 6\text{H}_2\text{O}$ , 98+%), iron nitrate nonahydrate ( $\text{Fe}(\text{NO}_3)_3 \cdot 9\text{H}_2\text{O}$ , 98+%), Igepal CO-520, 3-aminopropyltrimethoxysilane (APTMS, 97%), potassium tetrachloro palladate ( $\text{K}_2\text{PdCl}_4$ , 98 %), and phenylacetylene (98 %) were purchased from Sigma-Aldrich. N-octyl ether was purchased from Tokyo Chemical Industry Co. All solvents (methanol, chloroform, pentane, hexane, cyclohexane) were purchased from Sigma-Aldrich. All the reagents were used without any further purification.

## II. Instrumentation

Powder X-ray diffraction patterns were recorded with a Rigaku Miniflex diffractometer ( $\text{Cu K}\alpha$ ) operating at 40 kV and 150 mA. Transmission electron microscope (TEM) analyses were carried out on a JEOL JEM-2100F. Samples were also subjected to chemical microanalysis with an Oxford Instruments INCA TEM 300 system for energy dispersive X-ray (EDX) analysis. Specimens for TEM examination were prepared by dispersing the finely-ground powder in high purity ethanol and then allowing a drop of the suspension to evaporate on a 400 mesh carbon-coated grid. High resolution scanning electron microscope (HR-SEM) analyses were carried out using a Hitachi s-5500. Atomic Weight Percentage (ICP-MS) of the solid catalysts were determined by an inductively coupled plasma-mass spectrometry. The temperature-dependent and field-dependent magnetization measurements were measured with a Quantum Design MPMS-5 SQUID magnetometer. The field-dependent magnetization was measured at 10 and 300 K. The BET (Brunauer-Emmett-Teller) surface areas were calculated from  $p/p_0 = 0.05-0.3$  in the adsorption curve using a BET equation.

Hydrogenation products were analyzed using a gas chromatography (GC, Younglin, Acme-6000) equipped with a FID (flame ionization detector) and a capillary column (HP-Innowax, J&W). The  $^1\text{H}$  and  $^{13}\text{C}$  NMR spectra were recorded on a Varian 400-MHz Gemini operating at 400 MHz for  $^1\text{H}$  and 100 MHz for  $^{13}\text{C}$ , respectively. All chemical shifts were referenced to tetramethylsilane.

### III. Fabrication of Encapsulated Catalysts

**Preparation of  $\text{SiO}_2@\text{CuFe}_2\text{O}_4$ .** The core/shell silica microsphere was prepared by slight modification of the Unger procedure<sup>S1</sup> and the preparation of  $\text{SiO}_2@\text{CuFe}_2\text{O}_4$  was done on the basis of our previous report.<sup>S2</sup> For the synthesis of  $\text{SiO}_2@\text{CuFe}_2\text{O}_4$ , 1 g of core/shell silica microsphere was added into a 10 mL of ethanol with vigorous stirring, which was then sonicated to disperse the silica microspheres uniformly. To the solution, 0.0573 g of  $\text{Cu}(\text{NO}_3)_2 \cdot 2.5\text{H}_2\text{O}$  and 0.1991 g of  $\text{Fe}(\text{NO}_3)_3 \cdot 9\text{H}_2\text{O}$  were added. After complete dissolution of the Cu and Fe precursors, 20 mL of n-octyl ether and 1 mL of Igepal CO-520 were sequentially added into the mixed solution. The reaction mixture was sonicated for 20 min, which was then heated at 363 K until ethanol was almost completely evaporated. The mixture was kept for 1 h at 463 K to nucleate  $\text{CuFe}_2\text{O}_4$  NPs and further refluxed at 573 K for 3 h. The dark brown microspheres were separated by centrifugation (3500 rpm) with a couple of intermediate washing with ethanol. By using a magnet, the microspheres were collected, washed with ethanol, and dried in an oven at 353 K. The dried microspheres are denoted as  $\text{SiO}_2@\text{CuFe}_2\text{O}_4$ . Some of the microspheres were annealed at 773 K in air for 6 h. The annealed sample is virtually identical in shape but has slightly different magnetic property by comparison with the as-synthesized sample.

**Preparation of SiO<sub>2</sub>@MFe<sub>2</sub>O<sub>4</sub> and SiO<sub>2</sub>@CuO.** Catalysts with a general formula of SiO<sub>2</sub>@MFe<sub>2</sub>O<sub>4</sub> (M = Co, Fe) were prepared by incorporating magnetic components (MFe<sub>2</sub>O<sub>4</sub>) into porous silica shells in the same manner as the synthesis of SiO<sub>2</sub>@CuFe<sub>2</sub>O<sub>4</sub>. The only difference is the precursor complex. For the synthesis of SiO<sub>2</sub>@CoFe<sub>2</sub>O<sub>4</sub>, Co(NO<sub>3</sub>)<sub>2</sub>·6H<sub>2</sub>O and Fe(NO<sub>3</sub>)<sub>3</sub>·9H<sub>2</sub>O were used as sources of Co and Fe. Fe(NO<sub>3</sub>)<sub>3</sub>·9H<sub>2</sub>O and Cu(NO<sub>3</sub>)<sub>2</sub>·2.5H<sub>2</sub>O were used for the synthesis of SiO<sub>2</sub>@Fe<sub>3</sub>O<sub>4</sub> and SiO<sub>2</sub>@CuO, respectively.

**Preparation of SiO<sub>2</sub>@CuFe<sub>2</sub>O<sub>4</sub>-Pd.** The SiO<sub>2</sub>@CuFe<sub>2</sub>O<sub>4</sub> microsphere (0.2 g) was added into a 10 mL of ethanol with vigorous stirring to disperse the microspheres completely, to which a 0.3 mL of 3-aminopropyltrimethoxy-silane (APTMS) was added drop by drop. The reaction mixture was then vigorously stirred for 3 h to bind APTMS molecules on the surfaces of the microspheres. The amine-functionalized SiO<sub>2</sub>@CuFe<sub>2</sub>O<sub>4</sub> microspheres were separated by centrifugation (3500 rpm) with a couple of intermediate washing with ethanol several times, which were dried in an oven at 353 K. The resulting microspheres were purified by centrifuging them, discarding the supernatant, and re-dispersing them in ethanol. The functionalized microspheres were dispersed in a 10 mL of ethanol. To the solution, 0.0157 g of K<sub>2</sub>PdCl<sub>4</sub> dissolved in a 10 mL of deionized water was added. After the reaction mixture was vigorously stirred for 12 h, the resulting microspheres were separated by centrifugation with a couple of intermediate washing with ethanol, which was then dried in an oven at 353 K. The Pd-loaded product is denoted as SiO<sub>2</sub>@CuFe<sub>2</sub>O<sub>4</sub>-Pd.

**Preparation of SiO<sub>2</sub>@MFe<sub>2</sub>O<sub>4</sub>-Pd and SiO<sub>2</sub>@CuO-Pd.** Catalysts with a general formula of SiO<sub>2</sub>@MFe<sub>2</sub>O<sub>4</sub>-Pd (M = Co, Fe) and SiO<sub>2</sub>@CuO-Pd were prepared in the same manner as the synthesis of SiO<sub>2</sub>@CuFe<sub>2</sub>O<sub>4</sub>-Pd.

**Preparation of SiO<sub>2</sub>@Pd.** For the synthesis of SiO<sub>2</sub>@Pd, 0.2 g of core/shell silica microsphere was first functionalized with AMTMS. The functionalized microspheres were dispersed in a 10 mL of ethanol. To the solution, 0.0157 g of K<sub>2</sub>PdCl<sub>4</sub> dissolved in a 10 mL of deionized water was added. After the reaction mixture was vigorously stirred for 12 h, the resulting microspheres were separated by centrifugation with a couple of intermediate washing with ethanol, which was then dried in an oven at 353 K. The product is denoted as SiO<sub>2</sub>@Pd.

#### IV. General Procedure for Catalytic Reactions

**Solvent screening experiments (Table S3).** To a 5 mL round bottom flask connected to a gas balloon adaptor, phenylacetylene (0.91 mmol), SiO<sub>2</sub>@CuFe<sub>2</sub>O<sub>4</sub>-Pd (10 mg), and solvent (2 mL) were sequentially added. The reaction mixture was thoroughly purged with H<sub>2</sub> through an adaptor and the internal pressure was maintained by a filled balloon of H<sub>2</sub>. The progress of the reaction was monitored by <sup>1</sup>H-NMR and the yield was determined by <sup>1</sup>H-NMR. In addition, gas chromatography was also used to confirm the products.

**Hydrogenation of phenylacetylene with encapsulated catalysts.** To a 5 mL round bottom flask connected to a gas balloon adaptor, phenylacetylene (0.91 mmol), SiO<sub>2</sub>@CuFe<sub>2</sub>O<sub>4</sub>-Pd (10 mg) and hexane (2 mL) were sequentially added. The reaction mixture was thoroughly purged with H<sub>2</sub> through an adaptor and the internal pressure was maintained by a filled balloon of H<sub>2</sub>. The reaction mixture was collected at regular intervals by a syringe, which was analyzed by <sup>1</sup>H-NMR. The same experiments were conducted with SiO<sub>2</sub>@CuFe<sub>2</sub>O<sub>4</sub> and SiO<sub>2</sub>@Pd (entries 3, 4 in Table 1).

**Hydrogenation of phenylacetylene with Lindlar catalyst.** To a 5 mL round bottom flask connected to a gas balloon adaptor, phenylacetylene (0.91 mmol), Lindlar catalyst (5 wt% Pd on CaCO<sub>3</sub> poisoned with lead, Aldrich, 8.3 mg) and hexane (2 mL) were sequentially added. The reaction mixture was thoroughly purged with H<sub>2</sub> through an adaptor and the internal pressure was maintained by a filled balloon of H<sub>2</sub>. The reaction mixture was collected at regular intervals by a syringe, which was analyzed by <sup>1</sup>H-NMR. (entry 2 in Table 1).

**Hydrogenation of phenylacetylene with SiO<sub>2</sub>@CoFe<sub>2</sub>O<sub>4</sub>-Pd, SiO<sub>2</sub>@Fe<sub>3</sub>O<sub>4</sub>-Pd, and SiO<sub>2</sub>@CuO.** To a 5 mL round bottom flask connected to a gas balloon adaptor, phenylacetylene (0.91 mmol), SiO<sub>2</sub>@CoFe<sub>2</sub>O<sub>4</sub>-Pd (10 mg) and hexane (2 mL) were sequentially added. The reaction mixture was thoroughly purged with H<sub>2</sub> through an adaptor and the internal pressure was maintained by a filled balloon of H<sub>2</sub>. The progress of the reaction was monitored by <sup>1</sup>H-NMR. The reaction mixture was collected at regular intervals by a syringe, which was analyzed by <sup>1</sup>H-NMR. The same experiments were conducted with SiO<sub>2</sub>@Fe<sub>3</sub>O<sub>4</sub>-Pd and SiO<sub>2</sub>@CuO (Table S4).

**Hydrogenation of phenylacetylene with recycled SiO<sub>2</sub>@CuFe<sub>2</sub>O<sub>4</sub>-Pd.** To a 5 mL round bottom flask connected to a gas balloon adaptor, phenylacetylene (0.91 mmol), SiO<sub>2</sub>@CuFe<sub>2</sub>O<sub>4</sub>-Pd (10 mg) and hexane (2 mL) were sequentially added. The reaction mixture was thoroughly purged with H<sub>2</sub> through an adaptor and the internal pressure was maintained by a filled balloon of H<sub>2</sub>. The catalyst was separated by a magnet (Fig. S11). The recycle experiments were performed with the separated catalyst under the same conditions (Table S6). The recycle experiments were performed three times under the same conditions.

**Hydrogenation of a 1:1 mixture of phenylacetylene and styrene with SiO<sub>2</sub>@CuFe<sub>2</sub>O<sub>4</sub>-Pd.** To a 5 mL round bottom flask connected to a gas balloon adaptor, phenylacetylene (0.54 mmol), styrene (0.52 mmol), SiO<sub>2</sub>@CuFe<sub>2</sub>O<sub>4</sub>-Pd (10 mg) and hexane (2 mL) were sequentially added. The reaction mixture was thoroughly purged with H<sub>2</sub> through an adaptor and the internal pressure was maintained by a filled balloon of H<sub>2</sub>. The progress of the reaction was monitored by <sup>1</sup>H-NMR. The reaction mixture was collected at regular intervals by a syringe, which was analyzed by <sup>1</sup>H-NMR (Fig. S17).

## V. Tables and Figures

**Table S1. ICP-MS data for SiO<sub>2</sub>@CuFe<sub>2</sub>O<sub>4</sub>-Pd**

| Element | Weight (%) |
|---------|------------|
| Cu      | 0.89       |
| Fe      | 1.61       |
| Pd      | 4.15       |

**Table S2. BET surface areas of SiO<sub>2</sub>, SiO<sub>2</sub>@CuFe<sub>2</sub>O<sub>4</sub>, and SiO<sub>2</sub>@CuFe<sub>2</sub>O<sub>4</sub>-Pd**

| Sample                                                 | Total BET surface area <sup>a</sup><br>(m <sup>2</sup> g <sup>-1</sup> ) |
|--------------------------------------------------------|--------------------------------------------------------------------------|
| SiO <sub>2</sub> <sup>b</sup>                          | 383.1205                                                                 |
| SiO <sub>2</sub> @CuFe <sub>2</sub> O <sub>4</sub>     | 298.9725                                                                 |
| SiO <sub>2</sub> @CuFe <sub>2</sub> O <sub>4</sub> -Pd | 56.9144                                                                  |

<sup>a</sup> BET surface areas calculated from N<sub>2</sub> adsorption

<sup>b</sup> core-shell silica microsphere

**Table S3. Hydrogenation of phenylacetylene to styrene with SiO<sub>2</sub>@CuFe<sub>2</sub>O<sub>4</sub>-Pd<sup>a</sup>**

| Entry | Solvent     | Time (h) | Conversion (%) <sup>b</sup> | Selectivity (%) <sup>b</sup> | TOF(h <sup>-1</sup> ) <sup>c</sup> |
|-------|-------------|----------|-----------------------------|------------------------------|------------------------------------|
| 1     | Methanol    | 20.0     | 60                          | 97                           | 7                                  |
| 2     | Chloroform  | 12.0     | 29                          | 98                           | 6                                  |
| 3     | Pentane     | 3.0      | 62                          | 99                           | 48                                 |
| 4     | Hexane      | 2.5      | 98                          | 98                           | 91                                 |
| 5     | Cyclohexane | 2.0      | 71                          | 98                           | 83                                 |

<sup>a</sup> Reaction conditions: phenylacetylene 0.91 mmol, catalyst 10 mg, solvent 2 mL, H<sub>2</sub> balloon (*ca.* 1 atm). <sup>b</sup> Confirmed by <sup>1</sup>H NMR and GC. <sup>c</sup> [mol product]/[mol catalyst][hour].

**Table S4. Hydrogenation of phenylacetylene to styrene with various catalysts<sup>a</sup>**

| Entry | Spinel ferrite                                         | Time (h) | Conversion (%) <sup>b</sup> | Selectivity (%) <sup>b</sup> | TOF(h <sup>-1</sup> ) <sup>c</sup> |
|-------|--------------------------------------------------------|----------|-----------------------------|------------------------------|------------------------------------|
| 1     | SiO <sub>2</sub> @Pd                                   | 2.5      | 3                           | 99                           | 3                                  |
| 2     | SiO <sub>2</sub> @CoFe <sub>2</sub> O <sub>4</sub> -Pd | 2.5      | 18                          | 99                           | 17                                 |
| 3     | SiO <sub>2</sub> @Fe <sub>3</sub> O <sub>4</sub> -Pd   | 2.5      | 60                          | 87                           | 59                                 |
| 4     | SiO <sub>2</sub> @CuFe <sub>2</sub> O <sub>4</sub> -Pd | 2.5      | 98                          | 98                           | 91                                 |
| 5     | SiO <sub>2</sub> @CuO-Pd                               | 2.5      | -                           | -                            | -                                  |

<sup>a</sup> Reaction conditions: phenylacetylene 0.91 mmol, catalyst 10 mg, solvent 2 mL, H<sub>2</sub> balloon (*ca.* 1 atm). <sup>b</sup> Confirmed by <sup>1</sup>H NMR and GC. <sup>c</sup> [mol product]/[mol catalyst][hour].



**Table S5. Hydrogenation of styrene to ethyl benzene with various catalysts<sup>a</sup>**

| Entry | Catalyst                                               | Time (h) | Conversion (%) <sup>b</sup> |
|-------|--------------------------------------------------------|----------|-----------------------------|
| 1     | SiO <sub>2</sub> @Pd                                   | 2.5      | 99                          |
| 2     | SiO <sub>2</sub> @CuFe <sub>2</sub> O <sub>4</sub> -Pd | 2.5      | 88                          |
| 3     | SiO <sub>2</sub> @CuO-Pd                               | 2.5      | -                           |

<sup>a</sup> Reaction conditions: styrene 0.91 mmol, catalyst 10 mg, solvent 2 mL, H<sub>2</sub> balloon (*ca.* 1 atm). <sup>b</sup> Confirmed by <sup>1</sup>H NMR and GC.

**Table S6. Hydrogenation of phenylacetylene with used SiO<sub>2</sub>@CuFe<sub>2</sub>O<sub>4</sub>-Pd catalysts<sup>a</sup>**

| Number of recycle | Time (h) | Conversion (%) <sup>b</sup> | Selectivity (%) <sup>b</sup> |
|-------------------|----------|-----------------------------|------------------------------|
| 1                 | 2.5      | 98                          | 98                           |
|                   | 1.5      | 69                          | >99                          |
| 2                 | 2.5      | 99                          | 98                           |
|                   | 1.5      | 66                          | >99                          |
| 3                 | 2.5      | 98                          | 97                           |
|                   | 1.5      | 68                          | 99                           |

<sup>a</sup> Reaction conditions: phenylacetylene 0.91 mmol, catalyst 10 mg, solvent 2 mL, H<sub>2</sub> balloon (*ca.* 1 atm). <sup>b</sup> Confirmed by <sup>1</sup>H NMR and GC.

**Table S7. Turn over frequency of hydrogenation of phenylacetylene derivatives with SiO<sub>2</sub>@CuFe<sub>2</sub>O<sub>4</sub>-Pd<sup>a</sup>**

| Substrate                                                                         | Conversion (%) <sup>b</sup> | Selectivity (%) <sup>b</sup> | TOF(h <sup>-1</sup> ) <sup>c</sup> |
|-----------------------------------------------------------------------------------|-----------------------------|------------------------------|------------------------------------|
| 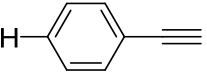 | 98                          | 98                           | 90                                 |
|  | 99                          | 88                           | 203                                |
|  | 99                          | 98                           | 226                                |
|  | 99                          | 73                           | 84                                 |

<sup>a</sup> Reaction conditions: phenylacetylene 0.91 mmol, catalyst 10 mg, solvent 2 mL, H<sub>2</sub> balloon (*ca.* 1 atm). <sup>b</sup> Confirmed by <sup>1</sup>H NMR. <sup>c</sup> [mol product]/[mol catalyst][hour].

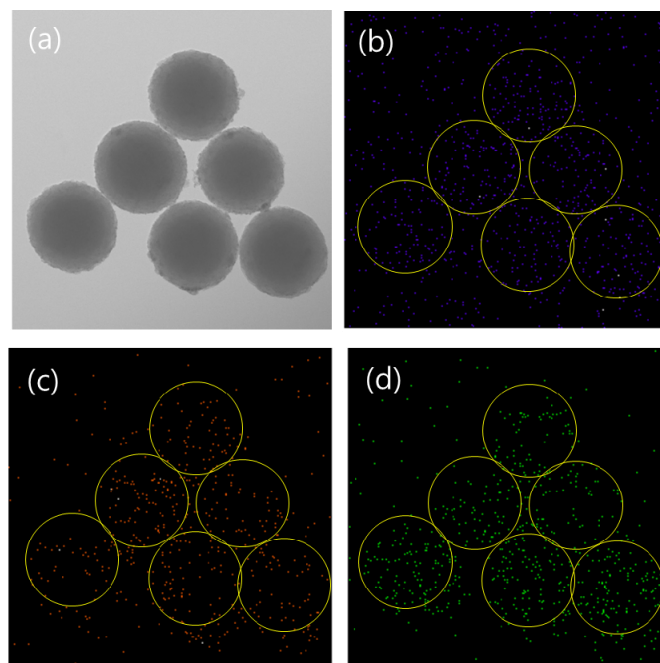

**Fig. S1** (a) TEM images of SiO<sub>2</sub>@CuFe<sub>2</sub>O<sub>4</sub>-Pd. Elemental distribution maps of (b) Cu, (c) Fe, and (d) Pd present in SiO<sub>2</sub>@CuFe<sub>2</sub>O<sub>4</sub>-Pd obtained from energy dispersive X-ray analysis.

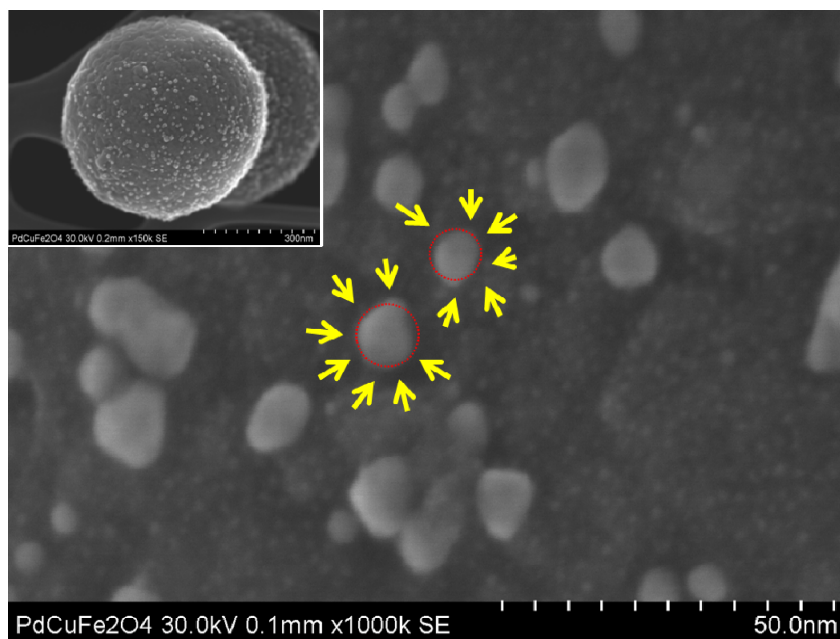

**Fig. S2** High resolution SEM images of  $\text{SiO}_2@ \text{CuFe}_2\text{O}_4\text{-Pd}$ . The inset is an overall image of a  $\text{SiO}_2@ \text{CuFe}_2\text{O}_4\text{-Pd}$  microsphere. Yellow arrows and red circles denote Pd and  $\text{CuFe}_2\text{O}_4$  NPs immobilized on a silica shell, respectively.

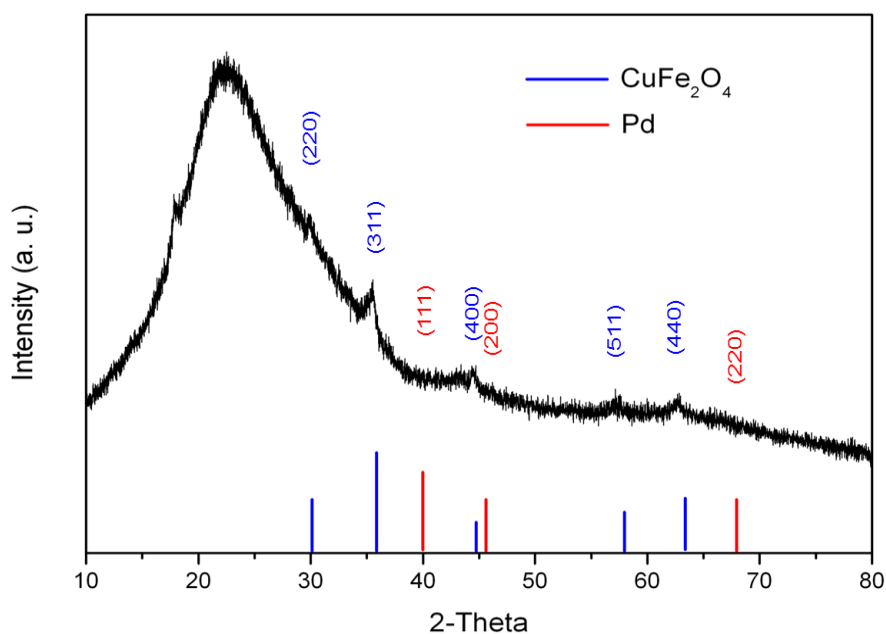

**Fig. S3** Powder X-ray diffraction patterns for as-synthesized  $\text{SiO}_2@ \text{CuFe}_2\text{O}_4\text{-Pd}$  microspheres. Vertical bars below the XRD patterns are theoretical peak positions of  $\text{CuFe}_2\text{O}_4$  and Pd.

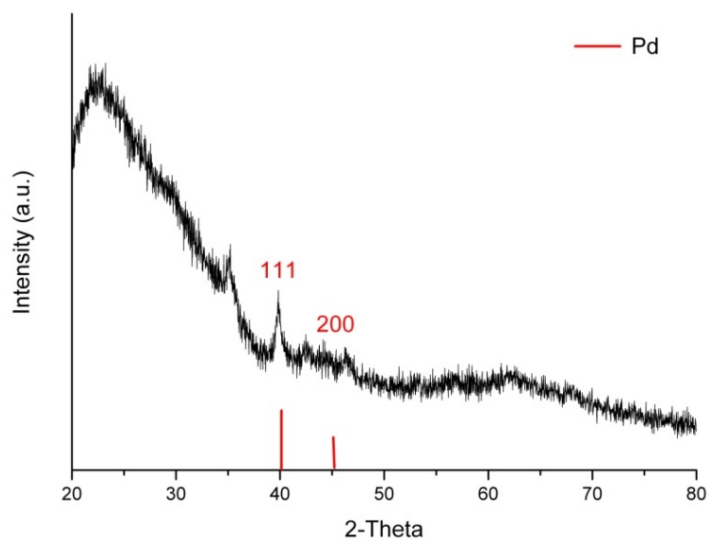

**Fig. S4** Powder X-ray diffraction patterns for  $\text{SiO}_2@ \text{CuFe}_2\text{O}_4\text{-Pd}$  annealed at 573K. Vertical bars below the XRD patterns are theoretical peak positions of Pd.

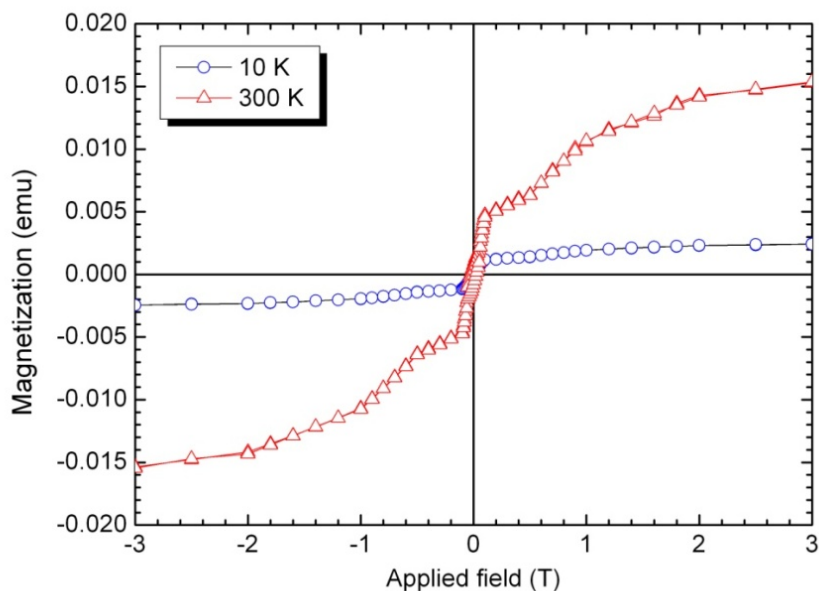

**Fig. S5** Field-dependent magnetization curves of  $\text{SiO}_2@ \text{CuFe}_2\text{O}_4$ . Open sphere and triangle symbols represent magnetization data collected at 10 and 300 K, respectively.

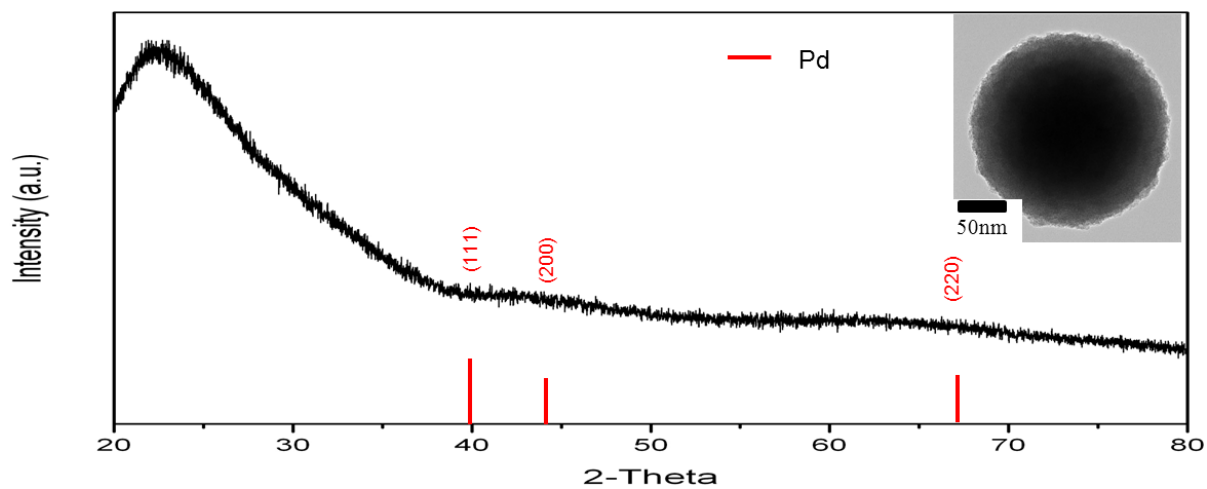

**Fig. S6** Powder X-ray diffraction patterns for SiO<sub>2</sub>@Pd. Vertical bars below the XRD patterns are theoretical peak positions of Pd. The inset is the TEM images of SiO<sub>2</sub>@Pd.

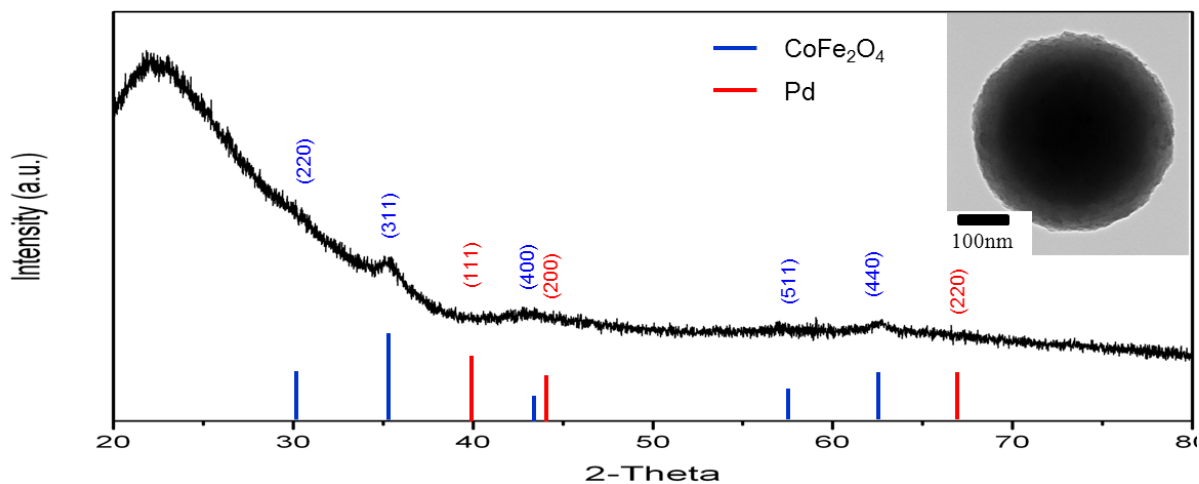

**Fig. S7** Powder X-ray diffraction patterns for SiO<sub>2</sub>@CoFe<sub>2</sub>O<sub>4</sub>-Pd. Vertical bars below the XRD patterns are theoretical peak positions of CoFe<sub>2</sub>O<sub>4</sub> and Pd. The inset is the TEM images of SiO<sub>2</sub>@CoFe<sub>2</sub>O<sub>4</sub>-Pd.

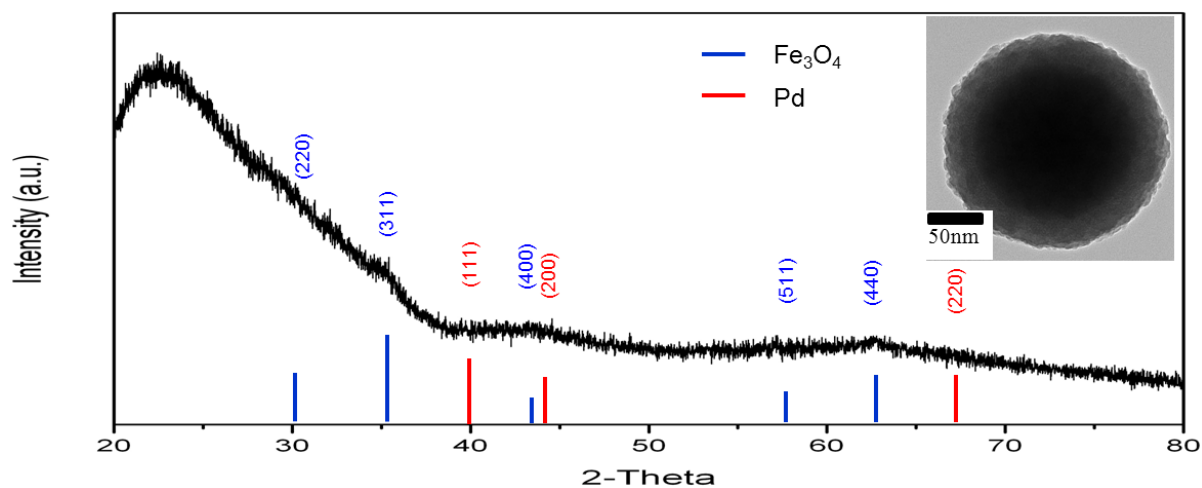

**Fig. S8** Powder X-ray diffraction patterns for SiO<sub>2</sub>@Fe<sub>3</sub>O<sub>4</sub>-Pd. Vertical bars below the XRD patterns are theoretical peak positions of Fe<sub>3</sub>O<sub>4</sub> and Pd. The inset is the TEM images of SiO<sub>2</sub>@Fe<sub>3</sub>O<sub>4</sub>-Pd.

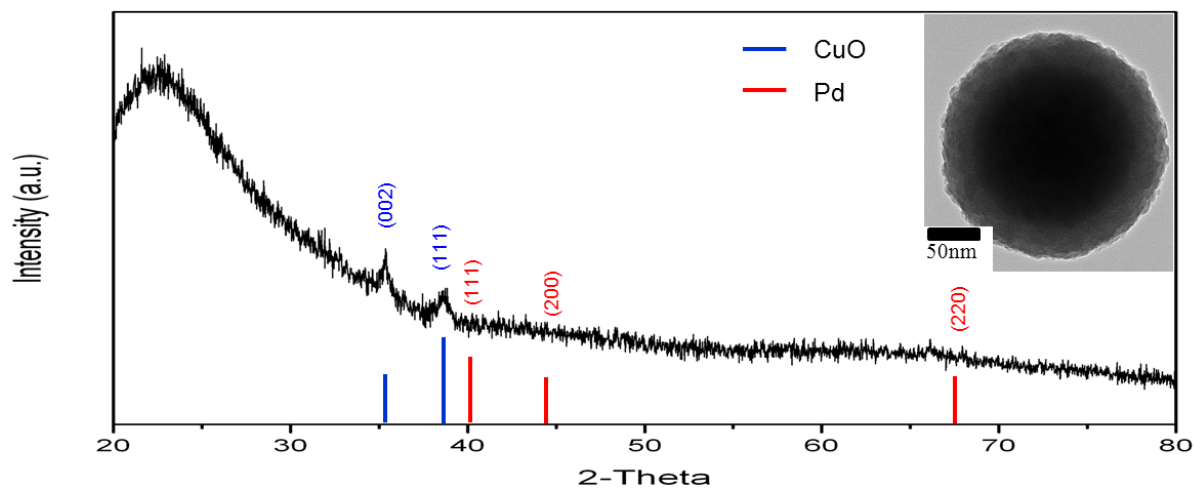

**Fig. S9** Powder X-ray diffraction patterns for SiO<sub>2</sub>@CuO-Pd. Vertical bars below the XRD patterns are theoretical peak positions of CuO and Pd. The inset is the TEM images of SiO<sub>2</sub>@CuO-Pd.

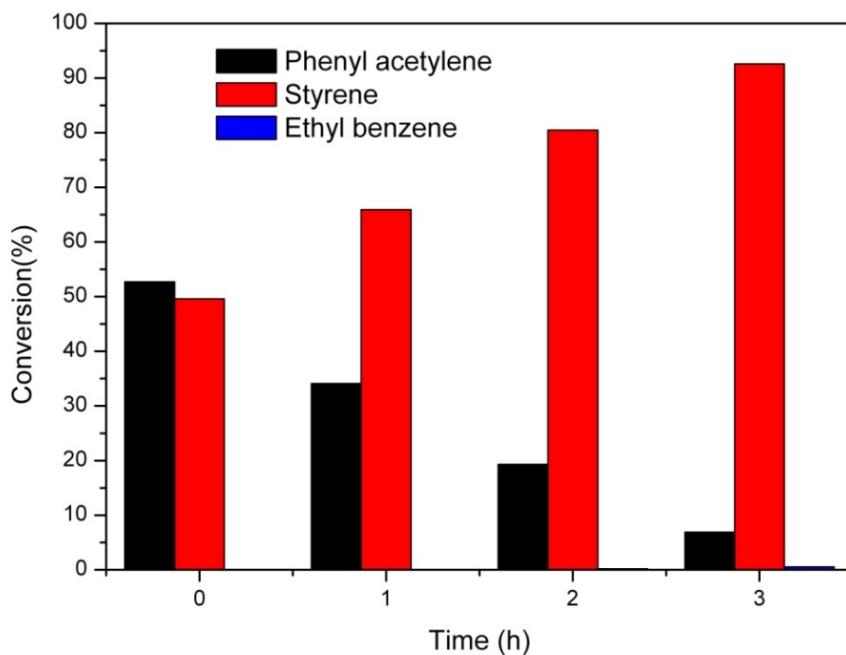

**Fig. S10** Hydrogenation product distribution obtained from a 1:1 mixture of phenylacetylene and styrene in hexane using  $\text{SiO}_2@\text{CuFe}_2\text{O}_4\text{-Pd}$  as the catalyst. Trace amount of ethyl benzene was detected after 3 h.

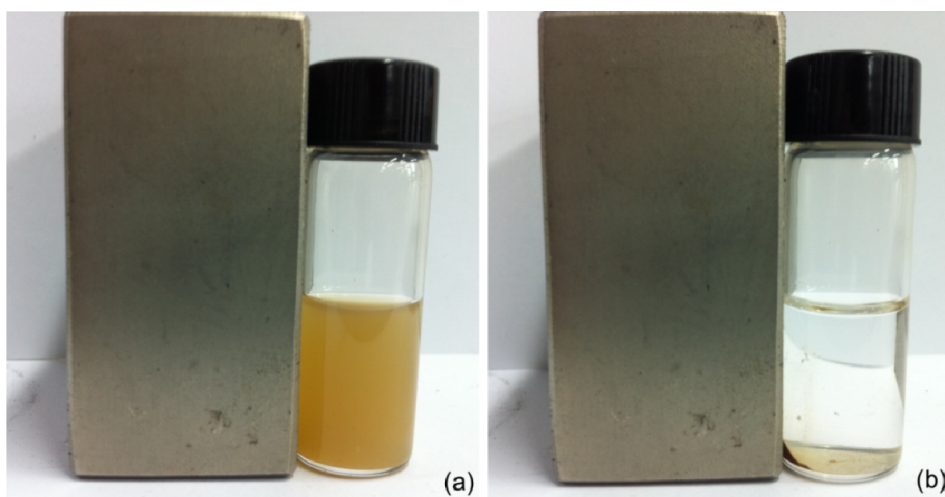

**Fig. S11** (a) Initial reaction mixture containing phenylacetylene and  $\text{SiO}_2@\text{CuFe}_2\text{O}_4\text{-Pd}$  in hexane. (b) Separation of  $\text{SiO}_2@\text{CuFe}_2\text{O}_4\text{-Pd}$  by a magnet after the reaction.

### Phenylacetylene.

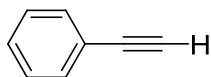

$^1\text{H}$  NMR (400 MHz,  $\text{CDCl}_3$ ):  $\delta$  (ppm) 3.07 (s, 1H, *CH* in alkyne) 7.42 (m, 2H, *CH*-3 and *CH*-5 in phenyl), 7.43 (m, 1H, *CH*-4 in phenyl), 7.55 (m, 2H, *CH*-2 and *CH*-6 in phenyl).

### Styrene.

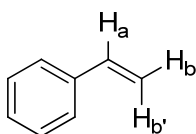

$^1\text{H}$  NMR (400 MHz,  $\text{CDCl}_3$ ):  $\delta$  (ppm) 6.70-6.77 (dd,  $J = 17.6$ ,  $J' = 10.8$ , 1H,  $H_a$ ), 5.75-5.79 (d,  $J = 17.6$ , 1H,  $H_b$ ), 5.25-5.27 (d,  $J = 10.8$ , 1H,  $H_{b'}$ ), 7.42 (m, 2H, *CH*-3 and *CH*-5 in phenyl), 7.43 (m, 1H, *CH*-4 in phenyl), 7.55 (m, 2H, *CH*-2 and *CH*-6 in phenyl).

### Ethyl benzene.

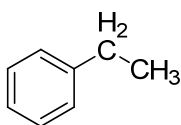

$^1\text{H}$  NMR (400 MHz,  $\text{CDCl}_3$ ):  $\delta$  (ppm) 1.22 (t, 3H,  $\text{CH}_3$ ), 2.53 (q, 2H,  $\text{CH}_2$ ), 7.42 (m, 2H, *CH*-3 and *CH*-5 in phenyl), 7.43 (m, 1H, *CH*-4 in phenyl), 7.55 (m, 2H, *CH*-2 and *CH*-6 in phenyl).



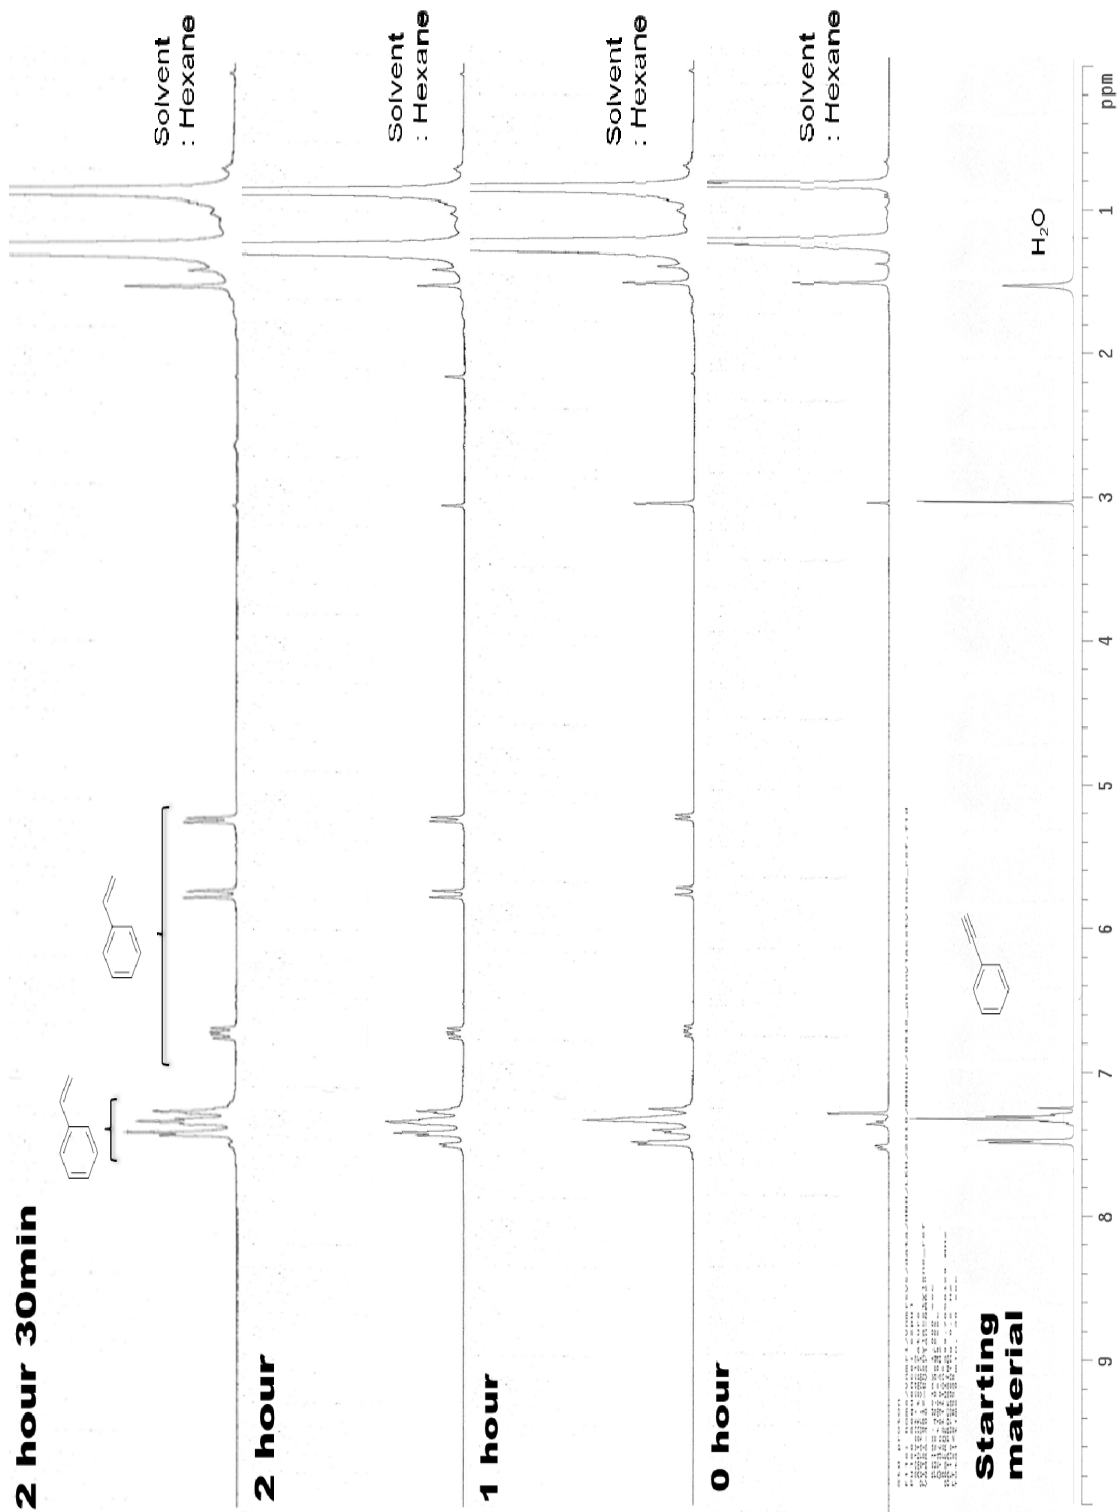

**Fig. S12** <sup>1</sup>H NMR spectra for the hydrogenation of phenylacetylene to styrene with SiO<sub>2</sub>@CuFe<sub>2</sub>O<sub>4</sub>-Pd as a function of time.

Std proton  
Sample: 0524\_Lindlar\_0.002g\_Hydro\_2h\_30m  
File: home/vnmr1/vnmrfsys/data/HNH/LKH/2011/0524\_Lindlar\_0.002g\_Hydro\_2h\_30m.fid  
Pulse Sequence: s2pu1  
Solvent: cdcl3  
Ambient temperature  
Operator: HNH  
File: 0524\_Lindlar\_0.002g\_Hydro\_2h\_30m  
VNMRS-400 "hvarlan-NMR2"  
Relax. delay 1.000 sec  
Pulse 45.0 degrees  
Acq. time 2.049 sec  
Width 6410.3 Hz  
16 repetitions  
OBSERVE H1, 399.7415174 MHz  
DATA PROCESSING  
Resol. enhancement -0.0 Hz  
F2 size 65536  
Total time 0 min, 55 sec

Table 1, entry 2  
**2 hour 30min**

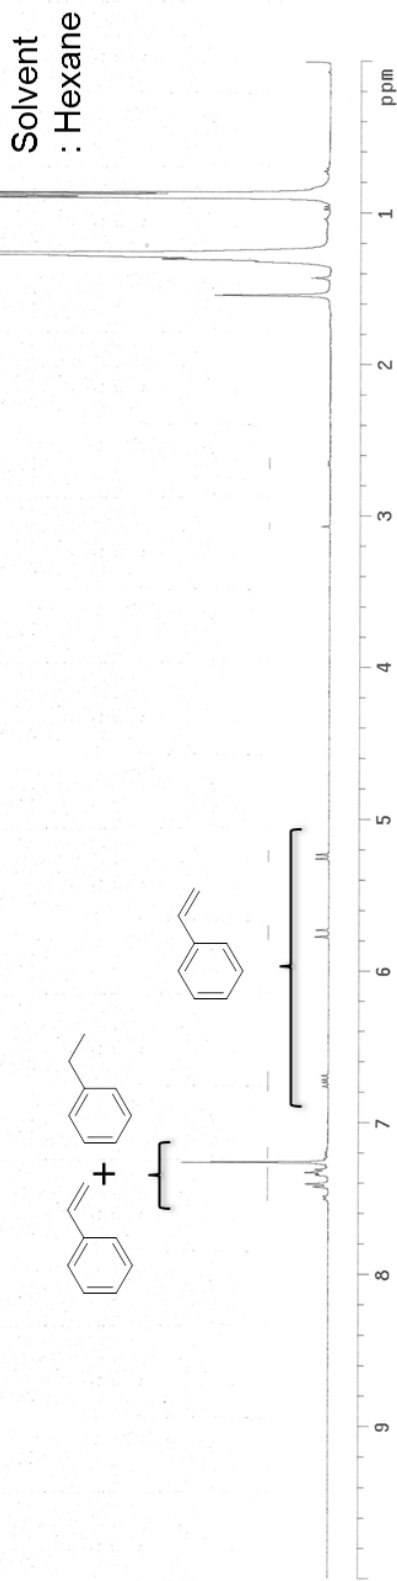

**Fig. S13** <sup>1</sup>H NMR Spectra for the hydrogenation of phenylacetylene to styrene with Lindlar catalyst.

Std proton

Sample: 0618\_2Pd\_mesoSiO2\_2h\_30m  
File: home/vnmr1/vnmrsys/data/HNH/LKH/2011/06/0618\_2Pd\_mesoSiO2\_2h\_30m.fid

Pulse Sequence: s2pu1

Solvent: cdcl3  
Ambient temperature  
Operator: HNH  
File: 0618\_2Pd\_mesoSiO2\_2h\_30m  
VNMR5-400 "vartan-NMR2"

Relax. delay 1.000 sec  
Pulse 45.0 degree  
Acq. time 2.049 sec  
Width 6410.3 Hz  
16 repetitions  
OBSERVE H1, 399.7415222 MHz  
DATA PROCESSING  
Resol. enhancement -0.0 Hz  
FT size 65536  
Total time 0 min, 55 sec

Table 1, entry 4

**2 hour 30min**

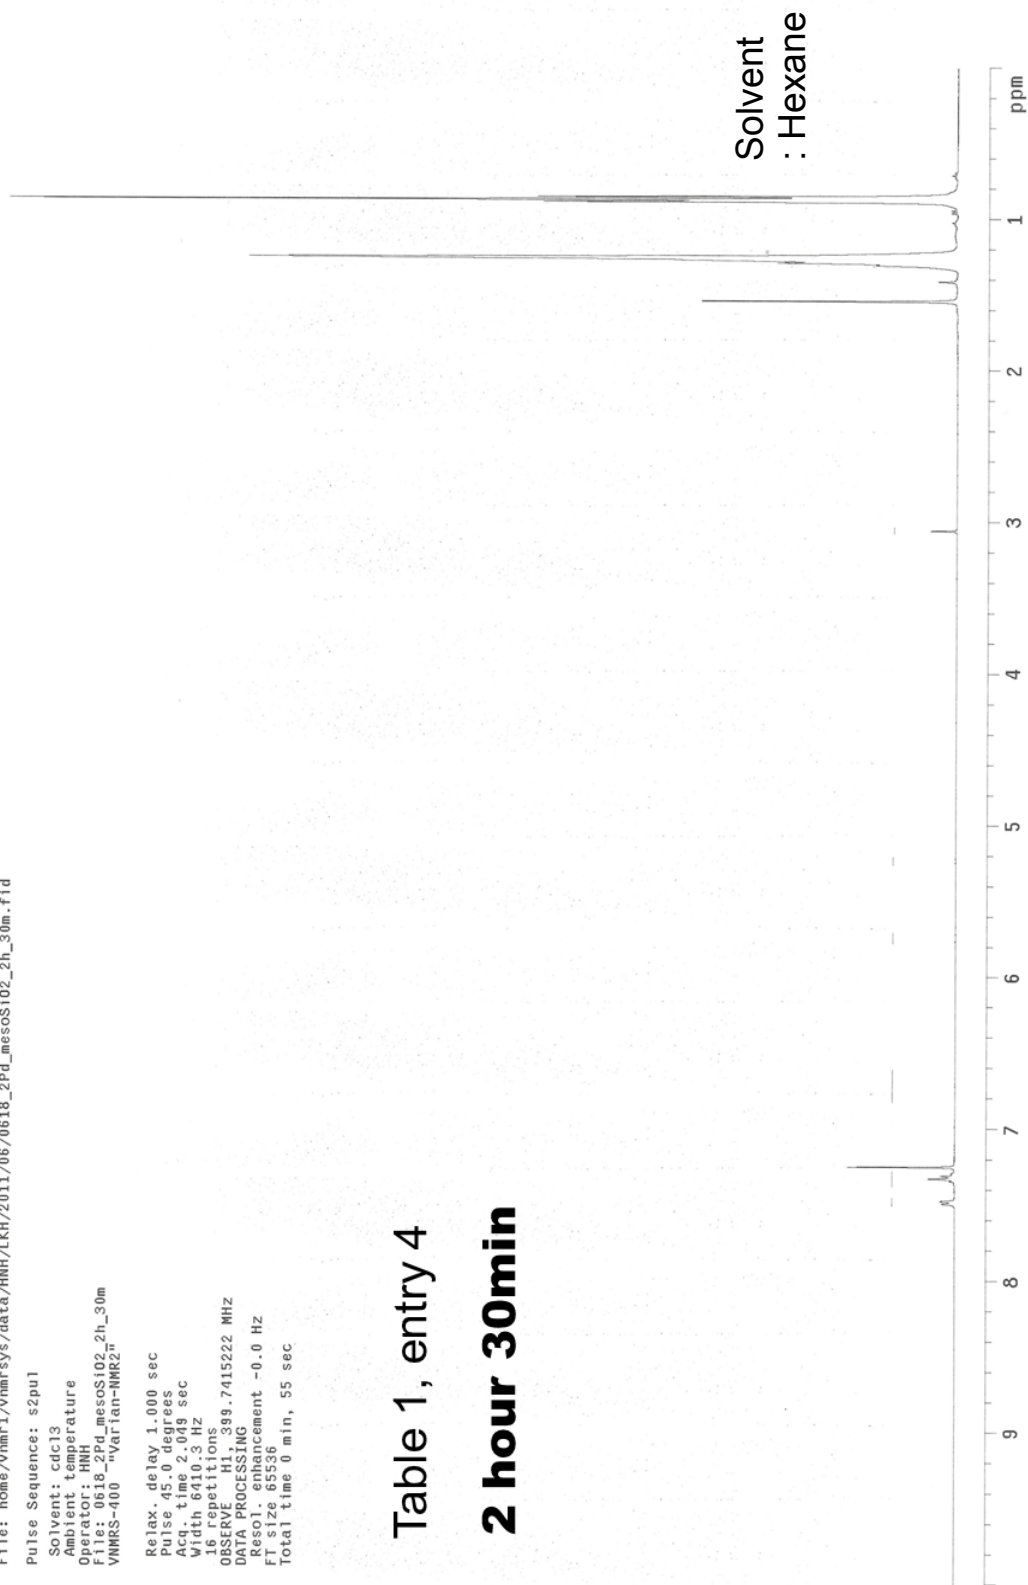

**Fig. S14** <sup>1</sup>H NMR Spectra for the hydrogenation of phenylacetylene to styrene with SiO<sub>2</sub>@Pd.

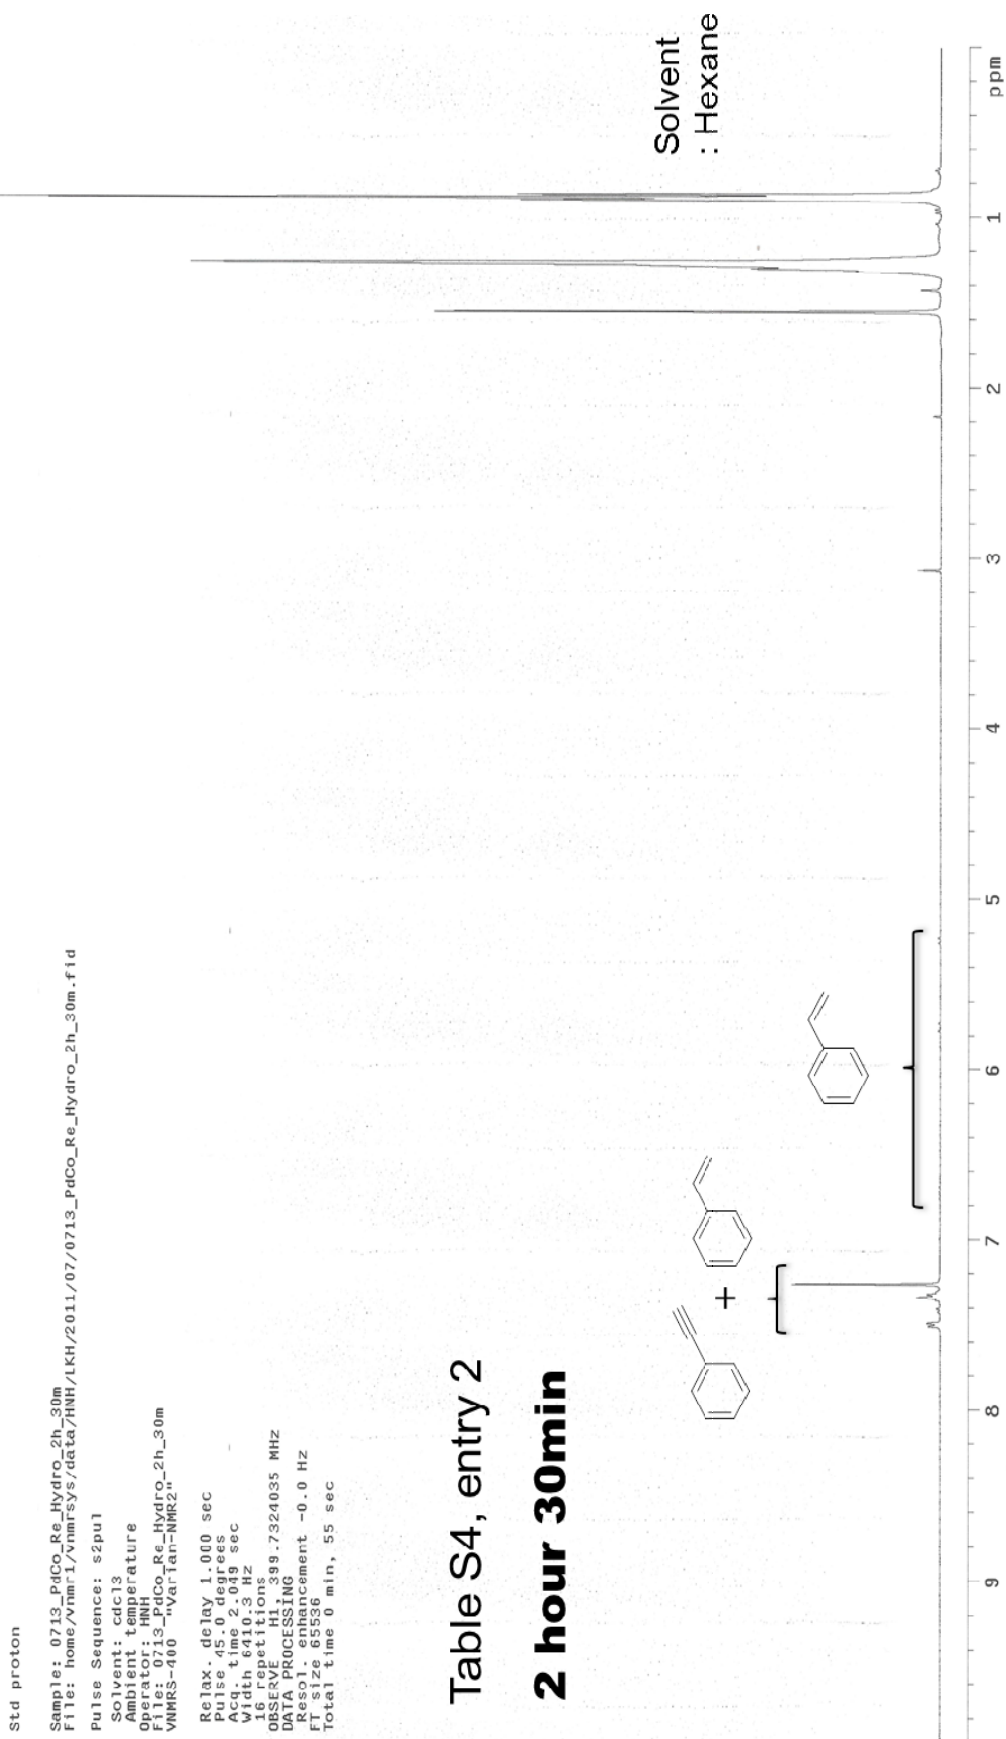

**Fig. S15**  $^1\text{H}$  NMR Spectra for the hydrogenation of phenylacetylene to styrene with  $\text{SiO}_2@\text{CoFe}_2\text{O}_4\text{-Pd}$ .

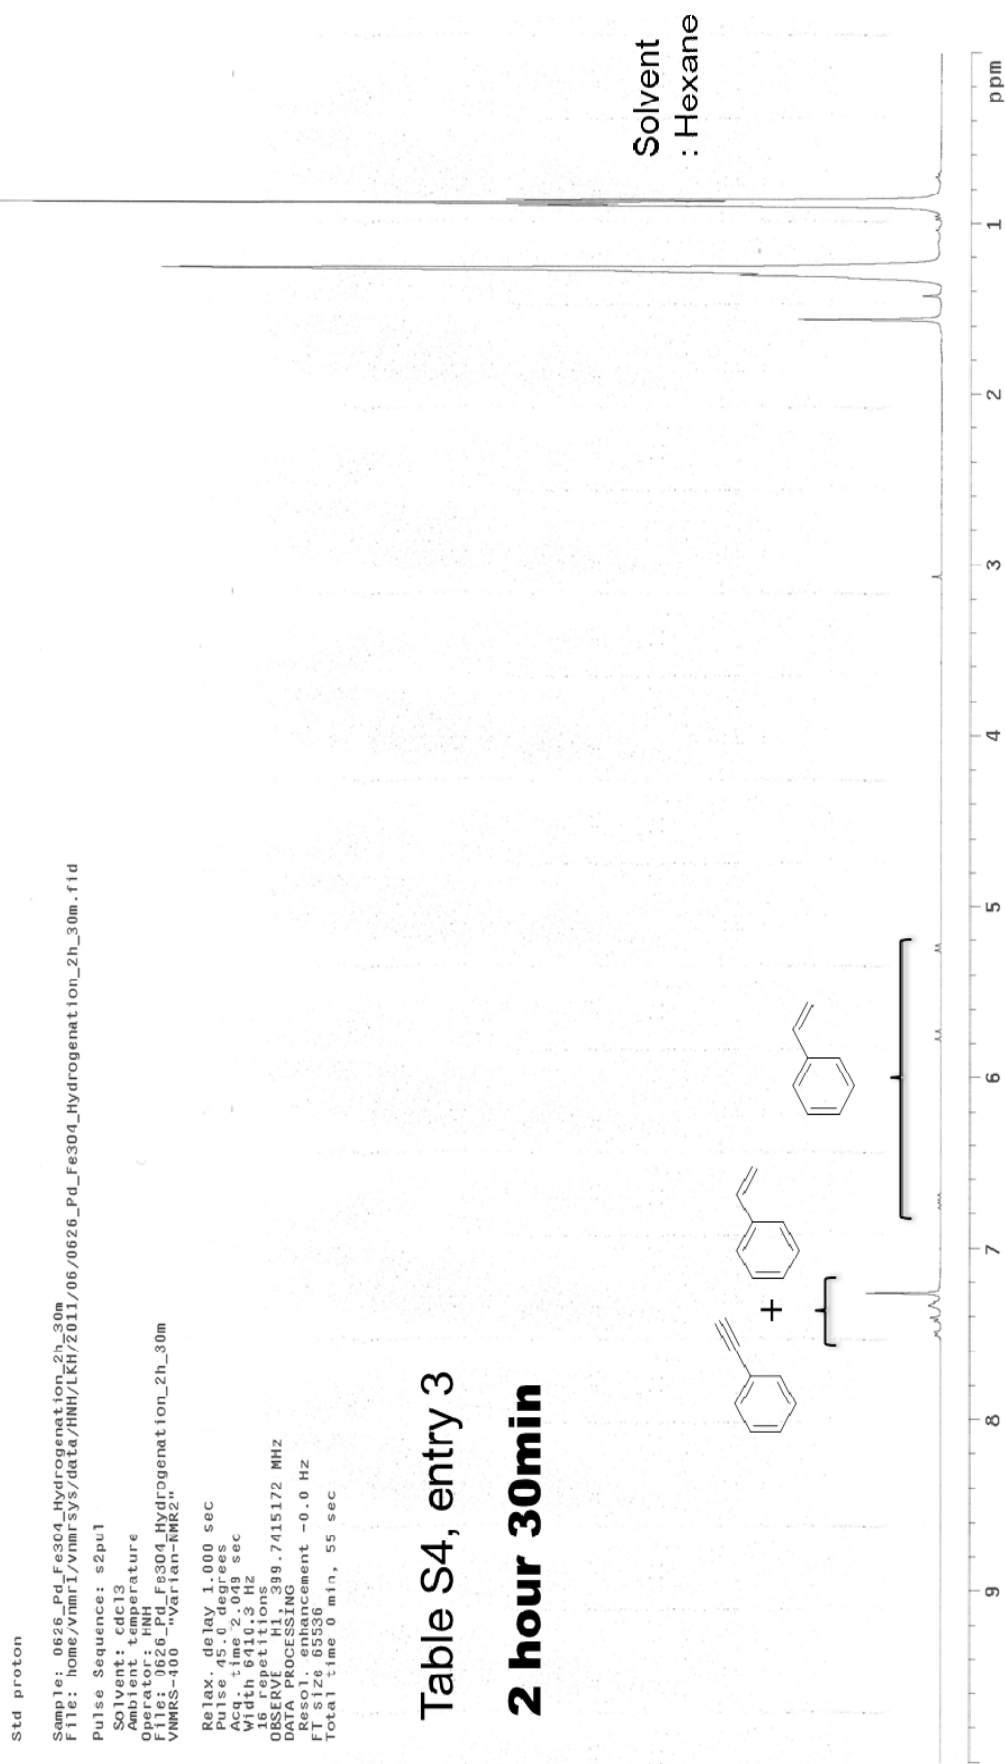

Table S4, entry 3

**2 hour 30min**

**Fig. S16**  $^1\text{H}$  NMR Spectra for the hydrogenation of phenylacetylene to styrene with  $\text{SiO}_2@\text{Fe}_3\text{O}_4\text{-Pd}$  as function of time.

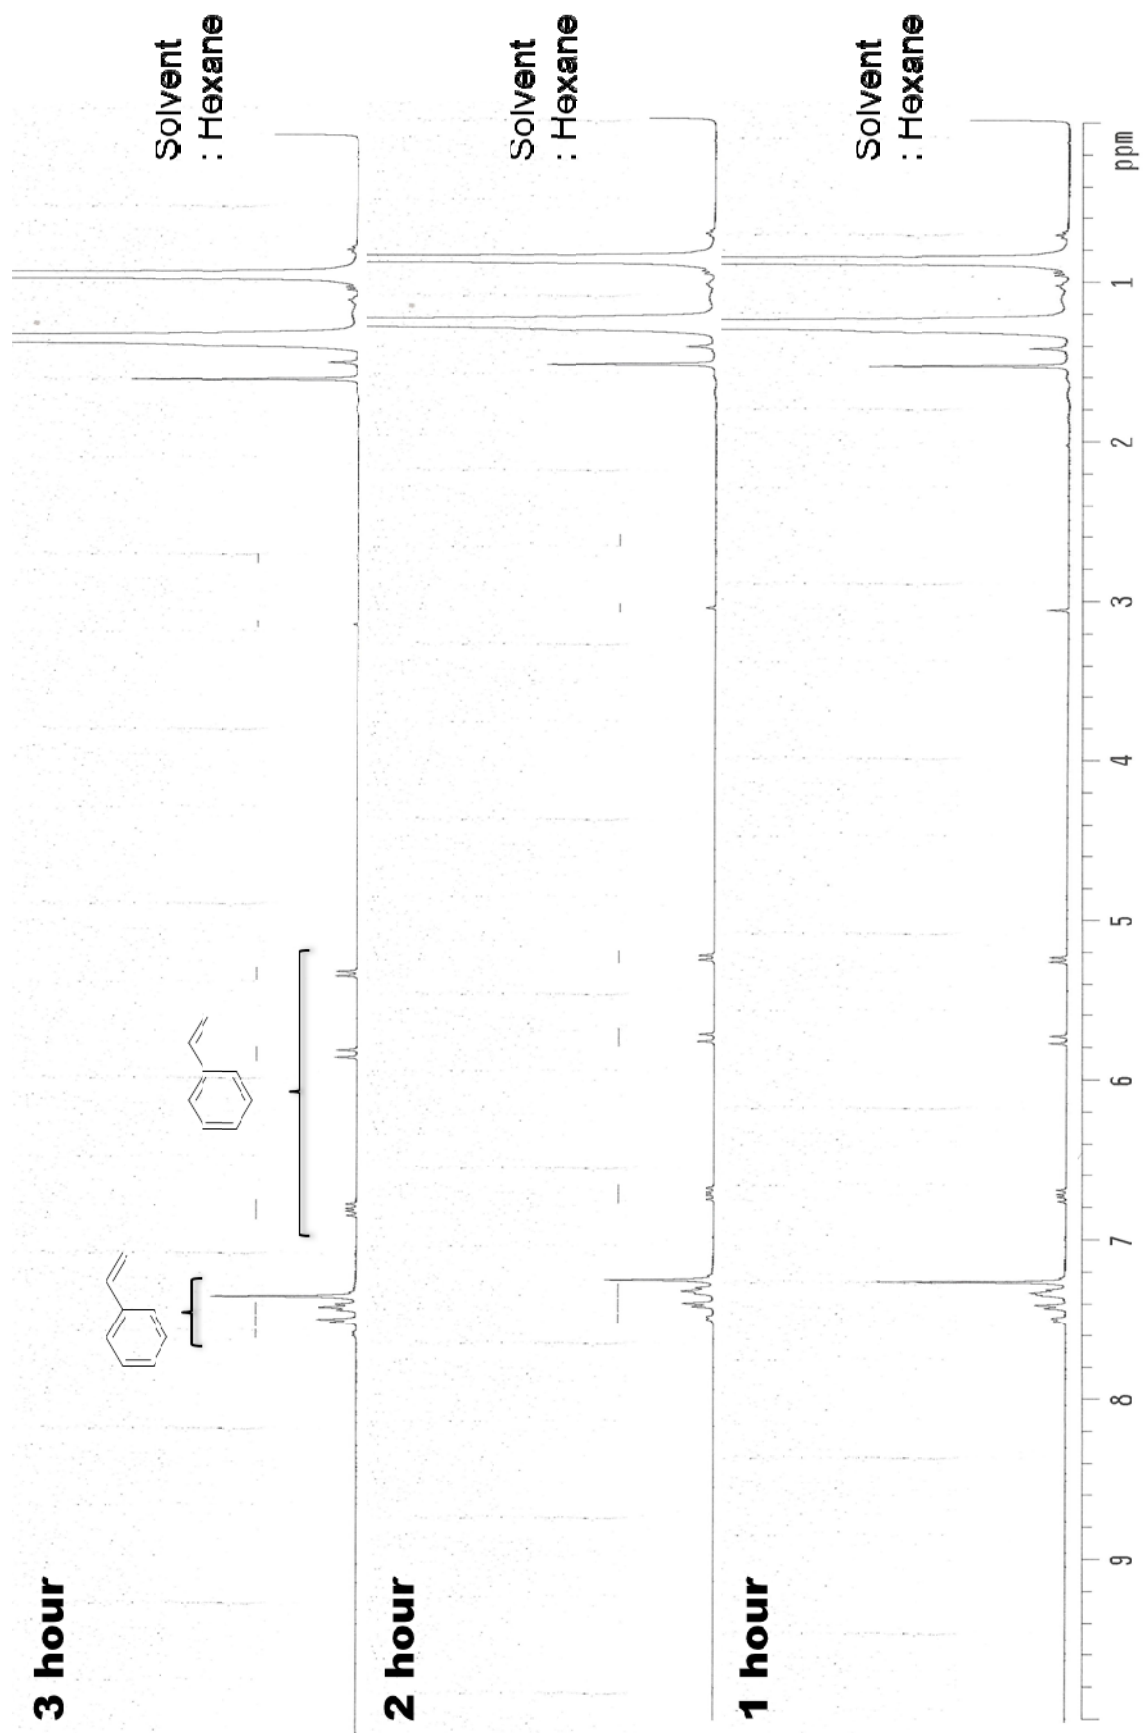

**Fig. S17** <sup>1</sup>H NMR Spectra for the hydrogenation of 1:1 mixture of phenylacetylene and styrene with SiO<sub>2</sub>@CuFe<sub>2</sub>O<sub>4</sub>-Pd as a function of time.

## Phenyl acetylene

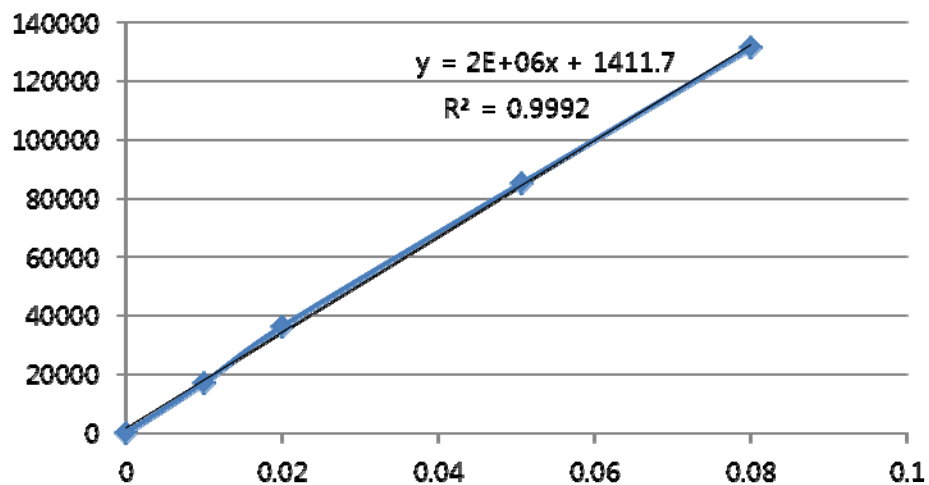

Fig. S18 GC calibration curve of phenylacetylene in hexane.

## Styrene

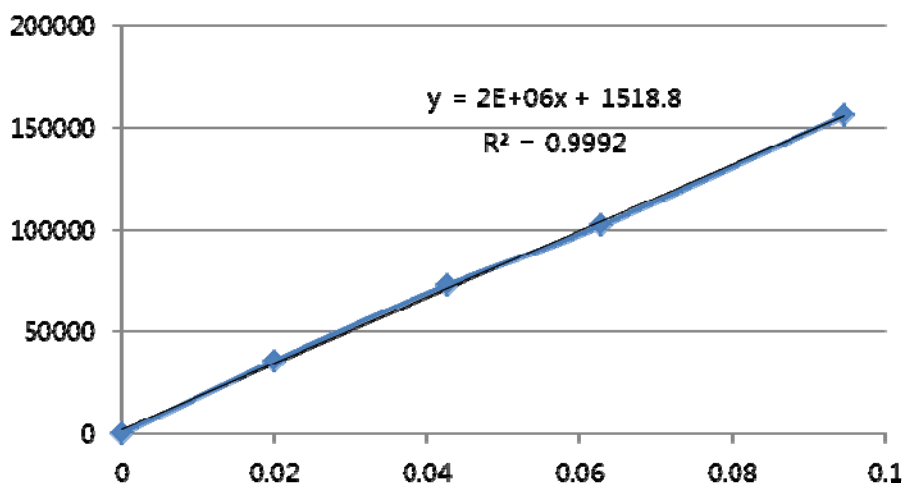

Fig. S19 GC calibration curve of styrene in hexane.

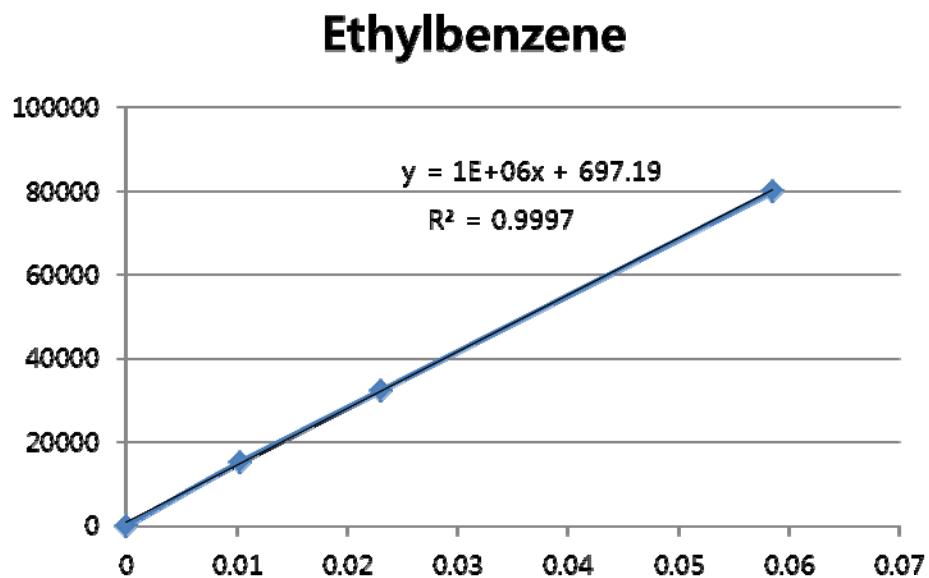

**Fig. S20** GC calibration curve of ethyl benzene in hexane.

## VI. References

- S1. G. Büchel, K. K. Unger, A. Matsumoto and K. Tsutsumi, *Adv. Mater.* 1998, **10**, 1036-1038.
- S2. K. R. Lee, S. Kim, D. H. Kang, J. I. Lee, Y. J. Lee, W. S. Kim, D.-H. Cho, H. B. Lim, J. Kim and N. H. Hur, *Chem. Mater.*, 2008, **20**, 6738-6742.
